# Supplementary material for: Loss of primary cilia occurs early in breast cancer development
Source: PubMed Central journal article supplement (PMC4076761; doi:10.1186/2046-2530-3-7), 2014-07-01
Supplement: 2046-2530-3-7-S1.pdf [file 2046-2530-3-7-S1.pdf]

Supplemental Fig. S1

Hoechst/ $\gamma$ -Tub

Arl13b

Ac-Tub

Merge

Normal

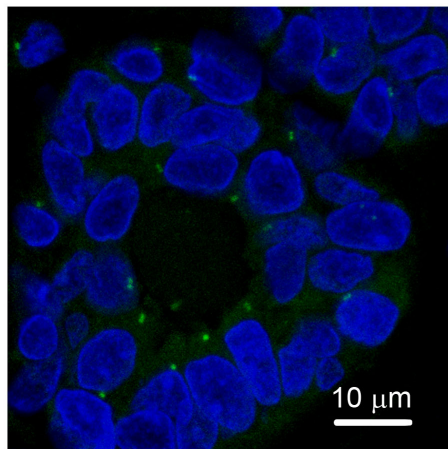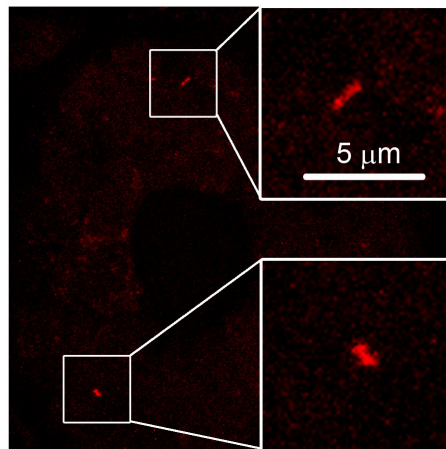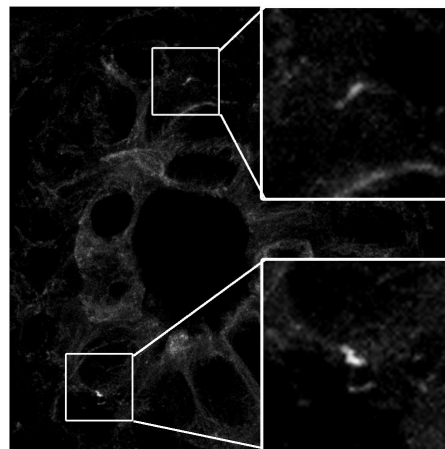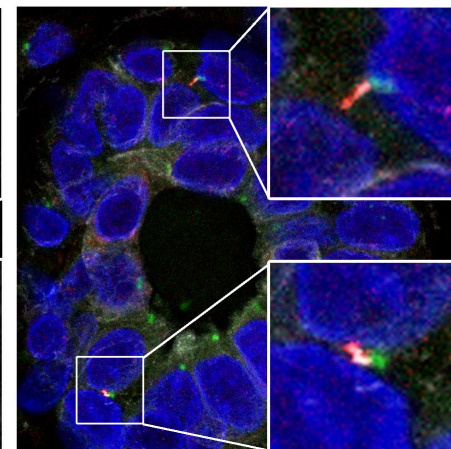

Cancer

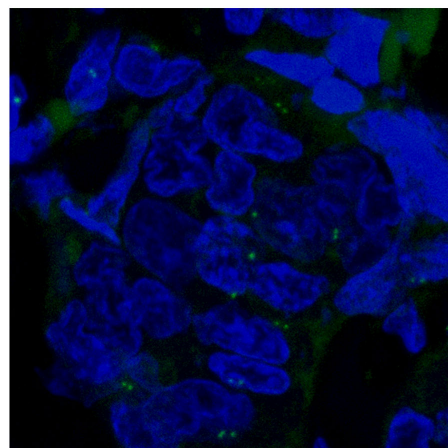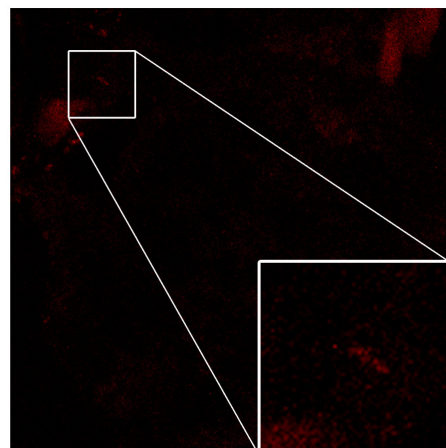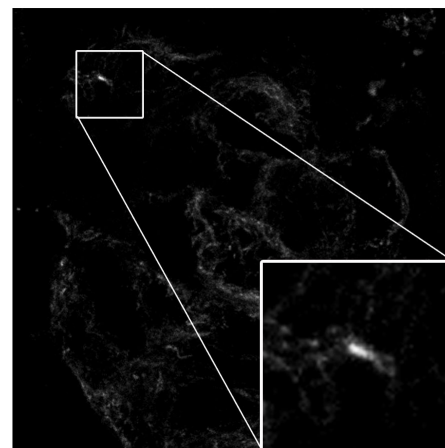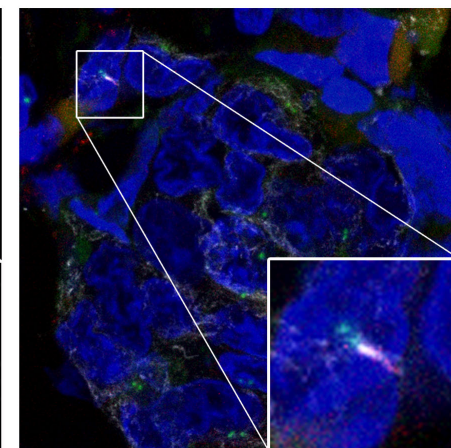

# Supplemental Fig. S2

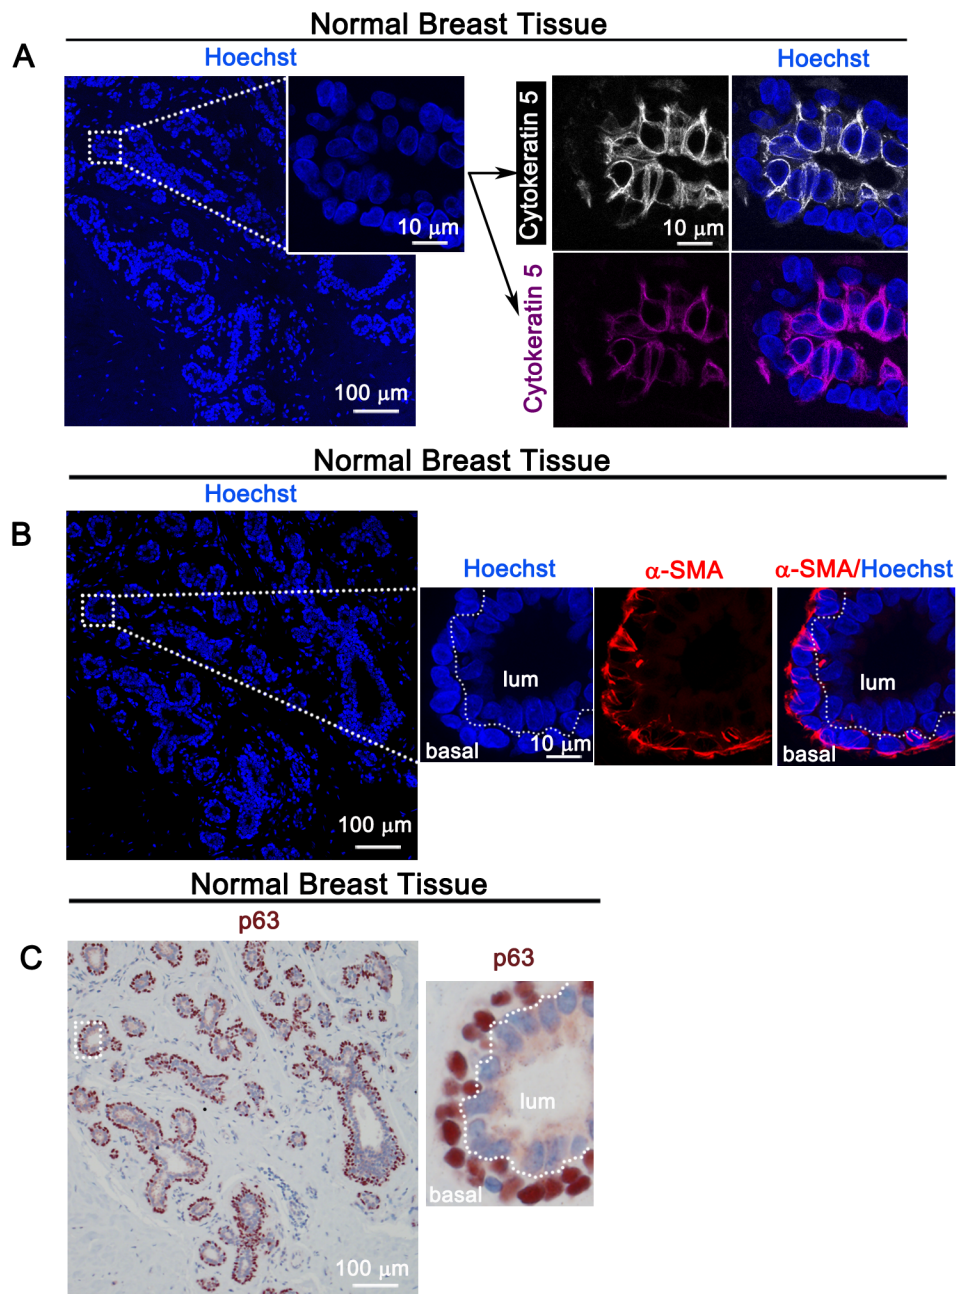

# Supplemental Fig. S3

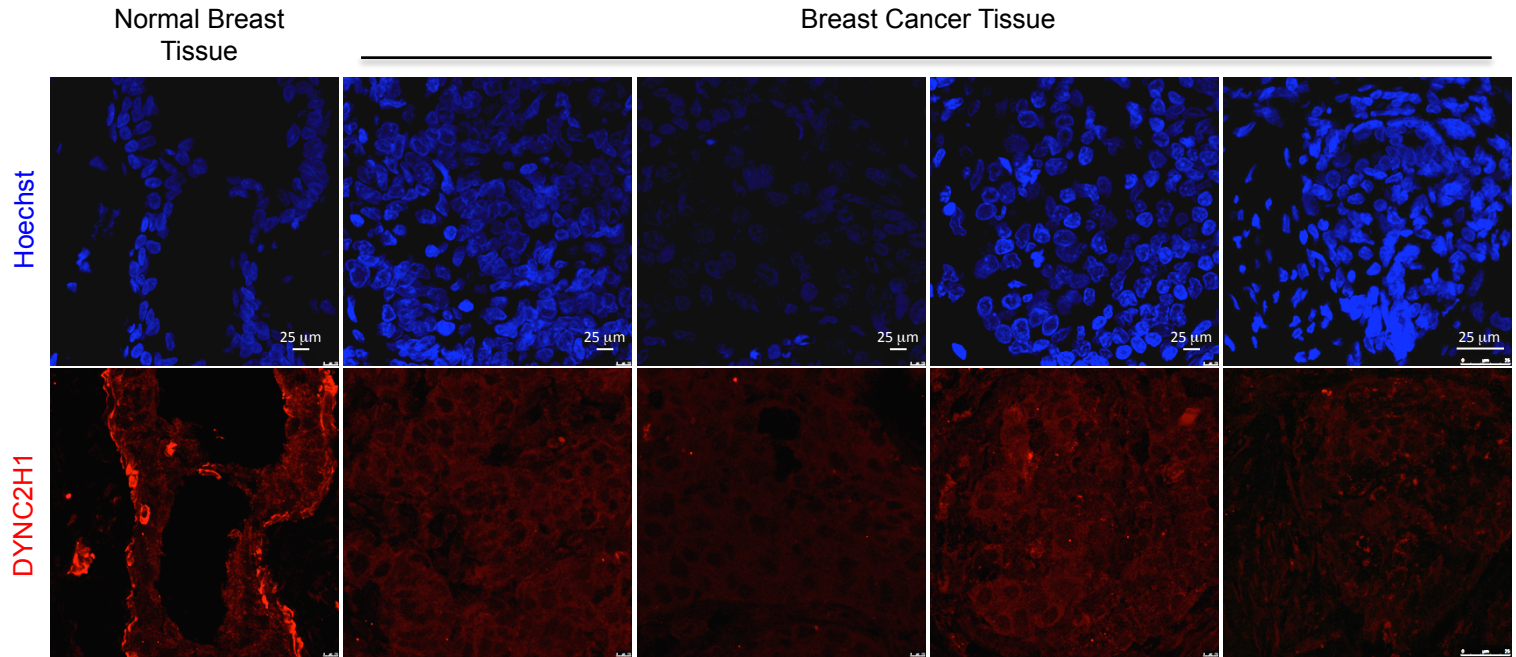

Supplemental Table S1A (accompanies Fig. 1C&D boxplots)

|         | n=Patients | % Cilia<br>Median | n=Nuclei | Range Nuclei/<br>Patient | n=Cilia | Range Cilia/<br>Patient |
|---------|------------|-------------------|----------|--------------------------|---------|-------------------------|
| RM B    | 12         | 23.6              | 2892     | 160-385                  | 711     | 14-136                  |
| RM L    | 12         | 1.05              | 5092     | 211-570                  | 65      | 0-14                    |
| HNE B   | 15         | 22.3              | 3125     | 62-392                   | 558     | 5-91                    |
| HNE L   | 15         | 0.50              | 4370     | 110-525                  | 147     | 0-47                    |
| CIS 1&2 | 23         | 0.82              | 18273    | 219-2687                 | 207     | 0-41                    |
| CIS 3   | 16         | 0.05              | 9590     | 87-1341                  | 74      | 0-37                    |
| INV 1&2 | 40         | 0.18              | 25863    | 97-1451                  | 206     | 0-46                    |
| INV 3   | 25         | 0.19              | 14622    | 127-1559                 | 58      | 0-15                    |

Supplemental Table S1B (accompanies Fig. 1C bar graph)

|         | Q1<br>n=Patients | Q1<br>% Patients | Q4<br>n=Patients | Q4<br>% Patients |
|---------|------------------|------------------|------------------|------------------|
| RM B    | 3                | 25               | 3                | 25               |
| HNE B   | 3                | 20               | 1                | 7                |
| CIS 1&2 | 23               | 100              | 0                | 0                |
| CIS 3   | 16               | 100              | 0                | 0                |
| INV 1&2 | 40               | 100              | 0                | 0                |
| INV 3   | 25               | 100              | 0                | 0                |

Supplemental Table S1C (accompanies Fig. 1D bar graph)

|         | Q1<br>n=Patients | Q1<br>% Patients | Q4<br>n=Patients | Q4<br>% Patients |
|---------|------------------|------------------|------------------|------------------|
| RM L    | 3                | 3                | 12               | 25               |
| HNE L   | 4                | 27               | 5                | 33               |
| CIS 1&2 | 6                | 26               | 5                | 22               |
| CIS 3   | 8                | 50               | 4                | 25               |
| INV 1&2 | 17               | 43               | 3                | 8                |
| INV 3   | 12               | 48               | 2                | 8                |

Supplemental Table S2A (accompanies Fig. 2C boxplots)

|                         | n=Patients | % Cilia<br>Median | n=Nuclei | Range<br>Nuclei/Patient | n=Cilia | Range<br>Cilia/Patient | Range<br>Percent Ciliated<br>Cells/Patient |
|-------------------------|------------|-------------------|----------|-------------------------|---------|------------------------|--------------------------------------------|
| RM B CK5-               | 12         | 26.0              | 2097     | 76-379                  | 514     | 9-135                  | 5.1-46.2                                   |
| RM B CK5+               | 11         | 19.6              | 730      | 6-147                   | 159     | 0-40                   | 0.0-57.1                                   |
| RM L CK5-               | 12         | 0.8               | 3264     | 5-448                   | 39      | 2-11                   | 0-40                                       |
| RM L CK5+               | 12         | 1.0               | 1828     | 1-334                   | 24      | 0-12                   | 0-6.25                                     |
| HNE B CK5-              | 10         | 14.9              | 1236     | 17-342                  | 282     | 4-89                   | 10.6-57.9                                  |
| HNE B CK5+              | 14         | 23.5              | 1857     | 13-392                  | 272     | 2-57                   | 2.0-32.4                                   |
| HNE L CK5-              | 13         | 3.3               | 1204     | 6-358                   | 37      | 0-14                   | 0-26.4                                     |
| HNE L CK5+              | 13         | 0                 | 3166     | 6-495                   | 110     | 0-37                   | 0-8.3                                      |
| Luminal A CK5-          | 35         | 0.2               | 23460    | 73-1451                 | 130     | 0-41                   | 0.0-4.4                                    |
| Luminal A CK5+          | 12         | 0                 | 992      | 4-441                   | 26      | 0-16                   | 0-39.0                                     |
| Luminal B CK5-          | 10         | 0                 | 4364     | 42-855                  | 22      | 0-14                   | 0-1.8                                      |
| Luminal B CK5+          | 4          | 0                 | 535      | 13-109                  | 30      | 0-30                   | 0-27.5                                     |
| Her2+CK5-               | 5          | 1                 | 1324     | 18-500                  | 8       | 0-4                    | 0-5.6                                      |
| Her2+ CK5+              | 4          | 0.3               | 804      | 124-294                 | 14      | 2-12                   | 0-9.7                                      |
| Triple negative CK5-    | 6          | 0.1               | 6836     | 388-1538                | 37      | 0-22                   | 0-4.5                                      |
| Triple negative<br>CK5+ | 6          | 0.8               | 2170     | 21-1380                 | 11      | 2-6                    | 0-9.5                                      |

Supplemental Table S2B (accompanies Fig. 2A & B boxplots)

|       | n=Patients | % Cilia<br>Median | n=Nuclei | Range Nuclei/<br>Patient | n=Cilia | Range Cilia/<br>Patient |
|-------|------------|-------------------|----------|--------------------------|---------|-------------------------|
| RM B  | 12         | 23.6              | 2892     | 160-385                  | 711     | 14-136                  |
| RM L  | 12         | 1.1               | 5092     | 211-570                  | 65      | 0-14                    |
| HNE B | 15         | 22.3              | 3125     | 62-392                   | 558     | 5-91                    |
| HNE L | 15         | 0.50              | 4370     | 110-525                  | 147     | 0-47                    |
| LUM A | 37         | 0.20              | 24452    | 97-1451                  | 156     | 0-46                    |
| LUM B | 10         | 0.08              | 4899     | 211-910                  | 38      | 0-30                    |
| Her2+ | 6          | 0.48              | 2128     | 247-500                  | 22      | 0-15                    |
| TN    | 12         | 0.10              | 9006     | 328-1559                 | 48      | 0-28                    |

Supplemental Table S3A (accompanies Fig. 3B boxplots)

|         | n=Patients | % Cilia Median | n=Nuclei | Range Nuclei/Patient | n=Cilia | Range Cilia/Patient |
|---------|------------|----------------|----------|----------------------|---------|---------------------|
| RM      | 12         | 18.4           | 4501     | 243-616              | 872     | 31-113              |
| HNE     | 15         | 11.8           | 4807     | 73-851               | 626     | 101-99              |
| CIS 1&2 | 23         | 4.7            | 4687     | 50-583               | 191     | 0-26                |
| CIS 3   | 16         | 1.3            | 3825     | 53-467               | 125     | 0-30                |
| INV 1&2 | 40         | 4.7            | 15004    | 17-1172              | 930     | 0-137               |
| INV 3   | 25         | 1.7            | 9988     | 47-1042              | 322     | 0-51                |

Supplemental Table S3B (accompanies Fig. 3B bar graph)

|         | Q1 n=Patients | Q1 % Patients | Q4 n=Patients | Q4 % Patients |
|---------|---------------|---------------|---------------|---------------|
| RM      | 3             | 25            | 3             | 25            |
| HNE     | 9             | 60            | 0             | 0             |
| CIS 1&2 | 22            | 95.6          | 0             | 0             |
| CIS 3   | 16            | 100           | 0             | 0             |
| INV 1&2 | 37            | 92.5          | 0             | 0             |
| INV 3   | 25            | 100           | 0             | 0             |



Supplemental Table S4A (accompanies Fig. 4B & C boxplots)

| Tissue Type | n=Patients With Cilia | n=Total Patients | n=Nuclei | Range Nuclei/ Patient | n=Cilia | Range Cilia/ Patient |
|-------------|-----------------------|------------------|----------|-----------------------|---------|----------------------|
| RM B        | 12                    | 12               | 2892     | 160-385               | 711     | 14-136               |
| RM L        | 9                     | 12               | 3808     | 211-570               | 65      | 1-12                 |
| HNE B       | 15                    | 15               | 3125     | 62-392                | 558     | 5-91                 |
| HNE L       | 12                    | 15               | 3505     | 110-525               | 147     | 1-47                 |
| CIS1&2      | 16                    | 23               | 13841    | 219-2687              | 206     | 2-41                 |
| CIS3        | 8                     | 16               | 5360     | 87-1341               | 74      | 1-37                 |
| INV1&2      | 23                    | 40               | 17362    | 345-1361              | 206     | 1-46                 |
| INV3        | 13                    | 25               | 7719     | 203-1559              | 58      | 1-15                 |

| Tissue Type | Median Cilia Length [ $\mu\text{m}$ ] | Range Median Cilia Length [ $\mu\text{m}$ ] | Min Cilia Length [ $\mu\text{m}$ ] | Max. Cilia Length [ $\mu\text{m}$ ] |
|-------------|---------------------------------------|---------------------------------------------|------------------------------------|-------------------------------------|
| RM B        | 0.76                                  | 0.57-1.07                                   | 0.14                               | 3.72                                |
| RM L        | 0.73                                  | 0.42-1.7                                    | 0.23                               | 4.33                                |
| HNE B       | 0.9                                   | 0.39-1.0                                    | 0.13                               | 4.64                                |
| HNE L       | 0.72                                  | 0.31-1.9                                    | 0.18                               | 4.34                                |
| CIS1&2      | 0.79                                  | 0.32-2.28                                   | 0.17                               | 6.81                                |
| CIS3        | 1.27                                  | 0.49-1.94                                   | 1.50                               | 6.67                                |
| INV1&2      | 1.10                                  | 0.21-2.74                                   | 0.12                               | 6.48                                |
| INV3        | 1.2                                   | 0.19-3.88                                   | 0.14                               | 5.55                                |

Supplemental Table S4B (accompanies Fig. 4B bar graph)

|         | n=Patients<br>in Q1 | % Patients<br>in Q1 | n=Patients<br>in Q4 | % Patients<br>in Q4 |
|---------|---------------------|---------------------|---------------------|---------------------|
| RM B    | 3                   | 25                  | 3                   | 25                  |
| HNE B   | 3                   | 20                  | 2                   | 13.3                |
| CIS 1&2 | 5                   | 31.3                | 6                   | 37.5                |
| CIS 3   | 2                   | 25                  | 6                   | 75                  |
| INV 1&2 | 3                   | 13                  | 13                  | 56.5                |
| INV 3   | 1                   | 7.7                 | 10                  | 76.9                |

Supplemental Table S4C (accompanies Fig. 4C bar graph)

|         | n=Patients<br>in Q1 | % Patients<br>in Q1 | n=Patients<br>in Q4 | % Patients<br>in Q4 |
|---------|---------------------|---------------------|---------------------|---------------------|
| RM L    | 2                   | 22.2                | 2                   | 22.2                |
| HNE B   | 5                   | 45.5                | 2                   | 18.2                |
| CIS 1&2 | 7                   | 43.8                | 5                   | 31.3                |
| CIS 3   | 2                   | 425                 | 4                   | 50                  |
| INV 1&2 | 3                   | 13                  | 10                  | 43.5                |
| INV 3   | 2                   | 15.4                | 8                   | 61.5                |

Supplemental Table S4D (accompanies Fig. 4D boxplots)

| Tissue Type | n=Patients With Cilia | n=Total Patients | n=Nuclei | Range Nuclei/ Patient | n=Cilia | Range Cilia/ Patient |
|-------------|-----------------------|------------------|----------|-----------------------|---------|----------------------|
| RM          | 12                    | 12               | 4501     | 243-616               | 872     | 31-113               |
| HNE         | 15                    | 15               | 4807     | 73-851                | 626     | 10-99                |
| CIS1&2      | 18                    | 23               | 3966     | 68-583                | 191     | 2-26                 |
| CIS3        | 12                    | 16               | 3224     | 76-467                | 125     | 1-30                 |
| INV1&2      | 36                    | 40               | 14590    | 114-1172              | 930     | 1-137                |
| INV3        | 22                    | 25               | 8914     | 47-1042               | 322     | 1-51                 |

| Tissue Type | Median Cilia Length [ $\mu\text{m}$ ] | Range Median Cilia Length [ $\mu\text{m}$ ] | Min Cilia Length [ $\mu\text{m}$ ] | Max. Cilia Length [ $\mu\text{m}$ ] |
|-------------|---------------------------------------|---------------------------------------------|------------------------------------|-------------------------------------|
| RM          | 1.0                                   | 0.823-1.95                                  | 0.15                               | 11.14                               |
| HNE         | 0.68                                  | 0.312-1.72                                  | 0.18                               | 6.17                                |
| CIS1&2      | 0.85                                  | 0.25-1.47                                   | 0.11                               | 5.26                                |
| CIS3        | 0.78                                  | 0.354-2.2                                   | 0.15                               | 2.87                                |
| INV1&2      | 0.95                                  | 0.374-1.85                                  | 0.09                               | 6.20                                |
| INV3        | 0.93                                  | 0.221-3.22                                  | 0.12                               | 5.56                                |

Supplemental Table S4E (accompanies Fig. 4D bar graph)

|         | n=Patients<br>in Q1 | % Patients<br>in Q1 | n=Patients<br>in Q4 | % Patients<br>in Q4 |
|---------|---------------------|---------------------|---------------------|---------------------|
| RM      | 3                   | 25                  | 3                   | 25                  |
| HNE     | 11                  | 73.3                | 1                   | 6.7                 |
| CIS 1&2 | 17                  | 73.9                | 0                   | 0                   |
| CIS 3   | 11                  | 68.8                | 1                   | 6.3                 |
| INV 1&2 | 18                  | 50                  | 4                   | 11.1                |
| INV 3   | 10                  | 45.5                | 2                   | 9.1                 |

Supplemental Table S5 (accompanies Fig. 5A & B)

|           |                                                               | Richardson AL, et. al. Invasive Breast Cancer Dataset<br>(n=18 cancers) |           |         |          | TCGA Invasive Ductal Breast Carcinoma Dataset<br>(n=389 cancers) |       |         |          |
|-----------|---------------------------------------------------------------|-------------------------------------------------------------------------|-----------|---------|----------|------------------------------------------------------------------|-------|---------|----------|
| symbol    | Description                                                   | entrez                                                                  | genbank   | log(FC) | P.Value  | adj.P.Value                                                      | B     | log(FC) | P.Value  |
| NPHP3     | nephronophthisis 3 (adolescent)                               | 27031                                                                   | NM_152530 | -1.10   | 3.76E-10 | 5.55E-08                                                         | 13.07 | -2.40   | 1.12E-38 |
| PKD2      | polycystic kidney disease 2 (autosomal dominant)              | 5311                                                                    | NM_000297 | -1.67   | 4.96E-08 | 3.21E-06                                                         | 8.29  | -2.62   | 1.64E-32 |
| TTC8      | tetratricopeptide repeat domain 8                             | 123016                                                                  | AW293939  | -1.46   | 7.79E-08 | 4.63E-06                                                         | 7.85  | -1.31   | 5.85E-06 |
| IFT46     | intraflagellar transport 46 homolog (Chlamydomonas)           | 56912                                                                   | NM_020153 | -1.07   | 1.48E-07 | 7.91E-06                                                         | 7.22  | -1.17   | 3.61E-04 |
| DYNC2H1   | dynein, cytoplasmic 2, heavy chain 1                          | 79659                                                                   | Z83800    | -0.66   | 1.07E-06 | 4.07E-05                                                         | 5.30  | -2.35   | 9.44E-36 |
| BBS2      | Bardet-Biedl syndrome 2                                       | 583                                                                     | AF342736  | -1.51   | 1.82E-06 | 6.23E-05                                                         | 4.78  | -1.91   | 1.09E-26 |
| BBS4      | Bardet-Biedl syndrome 4                                       | 585                                                                     | AI813772  | -0.77   | 1.11E-05 | 2.63E-04                                                         | 3.03  | -1.02   | 2.77E-01 |
| BBS1      | Bardet-Biedl syndrome 1                                       | 582                                                                     | NM_024649 | -0.70   | 2.99E-05 | 5.94E-04                                                         | 2.07  | -1.16   | 3.47E-04 |
| WDR19     | WD repeat domain 19                                           | 57728                                                                   | BC032578  | -0.56   | 4.94E-05 | 8.91E-04                                                         | 1.59  | -1.63   | 9.60E-34 |
| EVC       | Ellis van Creveld syndrome                                    | 2121                                                                    | AF216185  | -0.39   | 6.64E-05 | 1.11E-03                                                         | 1.30  | -1.55   | 5.73E-17 |
| SDCCAG8   | serologically defined colon cancer antigen 8                  | 10806                                                                   | NM_006642 | 0.48    | 4.07E-04 | 4.57E-03                                                         | -0.43 | -1.20   | 7.83E-06 |
| IFT88     | intraflagellar transport 88 homolog (Chlamydomonas)           | 8100                                                                    | NM_006531 | -0.67   | 1.56E-03 | 1.25E-02                                                         | -1.69 | -1.05   | 1.60E-01 |
| C14orf179 | chromosome 14 open reading frame 179                          | 112752                                                                  | AW235031  | -0.41   | 2.51E-03 | 1.77E-02                                                         | -2.14 | na      | na       |
| VHL       | von Hippel-Lindau tumor suppressor                            | 7428                                                                    | BF972755  | 0.33    | 6.56E-03 | 3.51E-02                                                         | -3.03 | 1.61    | 1.00E+00 |
| ARL13B    | ADP-ribosylation factor-like 13B                              | 200894                                                                  | BE858032  | -0.64   | 7.60E-03 | 3.89E-02                                                         | -3.16 | -1.38   | 2.79E-11 |
| OFD1      | oral-facial-digital syndrome 1                                | 8481                                                                    | NM_003611 | -0.55   | 8.37E-03 | 4.15E-02                                                         | -3.25 | -1.20   | 2.16E-03 |
| EVC2      | Ellis van Creveld syndrome 2                                  | 132884                                                                  | AY152403  | -0.22   | 9.47E-03 | 4.53E-02                                                         | -3.36 | -2.08   | 2.60E-18 |
| PKD1      | polycystic kidney disease 1 (autosomal dominant)              | 5310                                                                    | AA020938  | -0.56   | 1.11E-02 | 5.04E-02                                                         | -3.50 | -1.28   | 5.60E-07 |
| INVS      | inversin                                                      | 27130                                                                   | AF039217  | 0.17    | 0.018    | 0.070                                                            | -3.92 |         |          |
| PCM1      | pericentriolar material 1                                     | 5108                                                                    | NM_006197 | -0.49   | 0.019    | 0.074                                                            | -4.00 |         |          |
| TULP3     | tubby like protein 3                                          | 7289                                                                    | AK024246  | 0.59    | 0.022    | 0.080                                                            | -4.10 |         |          |
| 7-Sep     | septin 7                                                      | 989                                                                     | BF855173  | 0.25    | 0.027    | 0.094                                                            | -4.31 |         |          |
| WDR34     | WD repeat domain 34                                           | 89891                                                                   | BG338983  | 0.56    | 0.028    | 0.095                                                            | -4.32 |         |          |
| IFT122    | intraflagellar transport 122 homolog (Chlamydomonas)          | 55764                                                                   | AK000773  | -0.24   | 0.028    | 0.096                                                            | -4.34 |         |          |
| TRAF3IP1  | TNF receptor-associated factor 3 interacting protein 1        | 26146                                                                   | AF230877  | -0.31   | 0.038    | 0.118                                                            | -4.60 |         |          |
| INPP5E    | inositol polyphosphate-5-phosphatase, 72 kDa                  | 56623                                                                   | NM_019892 | -0.30   | 0.070    | 0.177                                                            | -5.12 |         |          |
| CC2D2A    | coiled-coil and C2 domain containing 2A                       | 57545                                                                   | BE893129  | -0.16   | 0.077    | 0.189                                                            | -5.19 |         |          |
| RPGRIP1L  | RPGRIP1-like                                                  | 23322                                                                   | BF515597  | 0.19    | 0.103    | 0.229                                                            | -5.43 |         |          |
| GLIS2     | GLIS family zinc finger 2                                     | 84662                                                                   | AA705182  | -0.42   | 0.111    | 0.243                                                            | -5.50 |         |          |
| MKKS      | McKusick-Kaufman syndrome                                     | 8195                                                                    | NM_018848 | 0.34    | 0.113    | 0.245                                                            | -5.51 |         |          |
| IFT140    | intraflagellar transport 140 homolog (Chlamydomonas)          | 9742                                                                    | NM_014714 | -0.16   | 0.123    | 0.260                                                            | -5.58 |         |          |
| ARL6      | ADP-ribosylation factor-like 6                                | 84100                                                                   | AL136815  | 0.22    | 0.127    | 0.265                                                            | -5.60 |         |          |
| DYNC2L1   | dynein, cytoplasmic 2, light intermediate chain 1             | 51626                                                                   | BC040558  | -0.25   | 0.131    | 0.272                                                            | -5.63 |         |          |
| IQCB1     | IQ motif containing B1                                        | 9657                                                                    | NM_014642 | 0.29    | 0.142    | 0.286                                                            | -5.69 |         |          |
| IFT27     | intraflagellar transport 27 homolog (Chlamydomonas)           | 11020                                                                   | NM_006860 | -0.17   | 0.155    | 0.304                                                            | -5.76 |         |          |
| NPHP4     | nephronophthisis 4                                            | 261734                                                                  | AB014573  | -0.21   | 0.165    | 0.317                                                            | -5.81 |         |          |
| BBS10     | Bardet-Biedl syndrome 10                                      | 79738                                                                   | NM_024685 | -0.27   | 0.189    | 0.347                                                            | -5.91 |         |          |
| HSPB11    | heat shock protein family B (small), member 11                | 51688                                                                   | NM_016126 | 0.28    | 0.205    | 0.365                                                            | -5.97 |         |          |
| TTC30B    | tetratricopeptide repeat domain 30B                           | 150737                                                                  | BC033795  | 0.24    | 0.222    | 0.384                                                            | -6.03 |         |          |
| MKS1      | Meckel syndrome, type 1                                       | 54903                                                                   | BC010061  | -0.18   | 0.229    | 0.393                                                            | -6.05 |         |          |
| NEK8      | NIMA (never in mitosis gene a)- related kinase 8              | 284086                                                                  | AI073943  | -0.20   | 0.230    | 0.394                                                            | -6.06 |         |          |
| BBS12     | Bardet-Biedl syndrome 12                                      | 166379                                                                  | AA971753  | -0.29   | 0.241    | 0.407                                                            | -6.09 |         |          |
| IFT80     | intraflagellar transport 80 homolog (Chlamydomonas)           | 57560                                                                   | AI473255  | 0.19    | 0.265    | 0.433                                                            | -6.16 |         |          |
| NPHP1     | nephronophthisis 1 (juvenile)                                 | 4867                                                                    | NM_000272 | 0.11    | 0.281    | 0.451                                                            | -6.20 |         |          |
| RAB5      | RAB, member RAS oncogene family-like 5                        | 64792                                                                   | NM_022777 | -0.20   | 0.285    | 0.455                                                            | -6.21 |         |          |
| IFT20     | intraflagellar transport 20 homolog (Chlamydomonas)           | 90410                                                                   | BC002640  | -0.28   | 0.326    | 0.497                                                            | -6.30 |         |          |
| CEP290    | centrosomal protein 290kDa                                    | 80184                                                                   | BC033323  | -0.13   | 0.344    | 0.514                                                            | -6.33 |         |          |
| IFT81     | intraflagellar transport 81 homolog (Chlamydomonas)           | 28981                                                                   | NM_014055 | -0.08   | 0.424    | 0.590                                                            | -6.47 |         |          |
| KIFAP3    | kinesin-associated protein 3                                  | 22920                                                                   | NM_014970 | 0.23    | 0.443    | 0.606                                                            | -6.49 |         |          |
| KIF3A     | kinesin family member 3A                                      | 11127                                                                   | NM_007054 | -0.16   | 0.474    | 0.634                                                            | -6.53 |         |          |
| AHI1      | Abelson helper integration site 1                             | 54806                                                                   | NM_017651 | -0.13   | 0.489    | 0.647                                                            | -6.55 |         |          |
| RPGR      | retinitis pigmentosa GTPase regulator                         | 6103                                                                    | NM_000328 | -0.08   | 0.495    | 0.653                                                            | -6.55 |         |          |
| BBS7      | Bardet-Biedl syndrome 7                                       | 55212                                                                   | NM_018190 | 0.06    | 0.544    | 0.693                                                            | -6.60 |         |          |
| TTC21B    | tetratricopeptide repeat domain 21B                           | 79809                                                                   | NM_024753 | 0.05    | 0.648    | 0.773                                                            | -6.69 |         |          |
| KIF3B     | kinesin family member 3B                                      | 9371                                                                    | NM_004798 | -0.08   | 0.650    | 0.775                                                            | -6.69 |         |          |
| TMEM216   | transmembrane protein 216                                     | 51259                                                                   | AF151078  | 0.08    | 0.670    | 0.790                                                            | -6.70 |         |          |
| IFT74     | intraflagellar transport 74 homolog (Chlamydomonas)           | 80173                                                                   | NM_025103 | -0.08   | 0.686    | 0.801                                                            | -6.71 |         |          |
| RAB3IP    | RAB3A interacting protein (rabin3)                            | 117177                                                                  | BG573839  | 0.05    | 0.732    | 0.834                                                            | -6.73 |         |          |
| KIF17     | kinesin family member 17                                      | 57576                                                                   | AA909345  | -0.02   | 0.817    | 0.892                                                            | -6.76 |         |          |
| TMEM67    | transmembrane protein 67                                      | 91147                                                                   | NM_153704 | 0.02    | 0.820    | 0.894                                                            | -6.77 |         |          |
| IFT172    | intraflagellar transport 172 homolog (Chlamydomonas)          | 26160                                                                   | AB033005  | 0.05    | 0.832    | 0.901                                                            | -6.77 |         |          |
| RAB8A     | RAB8A, member RAS oncogene family                             | 4218                                                                    | BC002977  | -0.05   | 0.847    | 0.911                                                            | -6.77 |         |          |
| WDR35     | WD repeat domain 35                                           | 57539                                                                   | AU151732  | 0.03    | 0.886    | 0.934                                                            | -6.78 |         |          |
| TRIM32    | tripartite motif containing 32                                | 22954                                                                   | BC003154  | -0.02   | 0.899    | 0.942                                                            | -6.78 |         |          |
| IFT52     | intraflagellar transport 52 homolog (Chlamydomonas)           | 51098                                                                   | NM_016004 | -0.01   | 0.949    | 0.971                                                            | -6.79 |         |          |
| BBS9      | Bardet-Biedl syndrome 9                                       | 27241                                                                   | BC032715  | -0.01   | 0.956    | 0.976                                                            | -6.79 |         |          |
| PKHD1     | polycystic kidney and hepatic disease 1 (autosomal recessive) | 5314                                                                    | NM_170724 | 0.00    | 0.966    | 0.981                                                            | -6.79 |         |          |
| IFT57     | intraflagellar transport 57 homolog (Chlamydomonas)           | 55081                                                                   | NM_018010 | -0.01   | 0.967    | 0.982                                                            | -6.79 |         |          |
| BBS5      | Bardet-Biedl syndrome 5                                       | 129880                                                                  | AW418788  | -0.01   | 0.972    | 0.984                                                            | -6.79 |         |          |

Note\*: green background = adjusted p value of >0.5 in the Richardson et. al. dataset and p value of >0.5 in the TCGA dataset.

Note\*\*: na = no probe for this gene in the TCGA array.

Note\*\*\*: double line denotes cutoff for adjusted p value of >0.5 and B value greater than 3 in the Richardson et. al. dataset.

Note that all of the cilia-related genes were analyzed in the TCGA dataset; however, those with values did not show statistically significant differences in log2 FC.
